# Supplementary material
Source: HighWire-hosted journal article supplement (https://jech.bmj.com/content/74/1/42)
Supplement: inline-supplementary-material-1 [file inline-supplementary-material-1.pdf]

## ONLINE SUPPLEMENTARY FILES

Patient Information Management System (PIMS) codes for the most common surgical procedures

| Theatre Event Spe | Case Type | Proc Code     | Proc Desc                                                                   |
|-------------------|-----------|---------------|-----------------------------------------------------------------------------|
| General Surgery   | Elective  | 3120500       | Excision of lesion(s) of skin and subcutaneous tissue of other site         |
|                   |           |               | Excision of lesion of skin and subcutaneous tissue of other site            |
|                   |           | 3120500 Total |                                                                             |
|                   |           | 3061402       | Repair of inguinal hernia, unilateral                                       |
|                   |           |               | Repair of inguinal hernia unilateral                                        |
|                   |           | 3061402 Total |                                                                             |
|                   |           | 3123500       | Excision of lesion(s) of skin and subcutaneous tissue of other site of head |
|                   |           |               | Excision of lesion of skin and subcutaneous tissue of other site of head    |
|                   |           | 3123500 Total |                                                                             |
|                   |           | 3123503       | Excision of lesion(s) of skin and subcutaneous tissue of leg                |
|                   |           |               | Excision of lesion of skin and subcutaneous tissue of leg                   |
|                   |           | 3123503 Total |                                                                             |
|                   |           | 3044500       | Laparoscopic cholecystectomy                                                |
|                   |           | 3044500 Total |                                                                             |
|                   |           | 3217100       | Anorectal examination                                                       |
|                   |           | 3217100 Total |                                                                             |
|                   |           | 3037300       | Exploratory laparotomy                                                      |
|                   |           |               | Laparotomy                                                                  |
|                   |           | 3037300 Total |                                                                             |
|                   |           | 3123001       | Excision of lesion(s) of skin and subcutaneous tissue of nose               |
|                   |           |               | Excision of lesion of skin and subcutaneous tissue of nose                  |
|                   |           | 3123001 Total |                                                                             |
|                   |           | 3200301       | Right hemicolectomy with anastomosis                                        |
|                   |           | 3200301 Total |                                                                             |
|                   |           | 3123002       | Excision of lesion(s) of skin and subcutaneous tissue of ear                |
|                   |           |               | Excision of lesion of skin and subcutaneous tissue of ear                   |

Figure 1. PIMS codes for the most common elective general surgical procedures

Proc code = procedure code, proc desc = procedure description

| Theatre Event Spe | Case Type | Proc Code     | Proc Desc                                                                   |
|-------------------|-----------|---------------|-----------------------------------------------------------------------------|
| General Surgery   | Elective  | 3120500       | Excision of lesion(s) of skin and subcutaneous tissue of other site         |
|                   |           |               | Excision of lesion of skin and subcutaneous tissue of other site            |
|                   |           | 3120500 Total |                                                                             |
|                   |           | 3061402       | Repair of inguinal hernia, unilateral                                       |
|                   |           |               | Repair of inguinal hernia unilateral                                        |
|                   |           | 3061402 Total |                                                                             |
|                   |           | 3123500       | Excision of lesion(s) of skin and subcutaneous tissue of other site of head |
|                   |           |               | Excision of lesion of skin and subcutaneous tissue of other site of head    |
|                   |           | 3123500 Total |                                                                             |
|                   |           | 3123503       | Excision of lesion(s) of skin and subcutaneous tissue of leg                |
|                   |           |               | Excision of lesion of skin and subcutaneous tissue of leg                   |
|                   |           | 3123503 Total |                                                                             |
|                   |           | 3044500       | Laparoscopic cholecystectomy                                                |
|                   |           | 3044500 Total |                                                                             |
|                   |           | 3217100       | Anorectal examination                                                       |
|                   |           | 3217100 Total |                                                                             |
|                   |           | 3037300       | Exploratory laparotomy                                                      |
|                   |           |               | Laparotomy                                                                  |
|                   |           | 3037300 Total |                                                                             |
|                   |           | 3123001       | Excision of lesion(s) of skin and subcutaneous tissue of nose               |
|                   |           |               | Excision of lesion of skin and subcutaneous tissue of nose                  |
|                   |           | 3123001 Total |                                                                             |
|                   |           | 3200301       | Right hemicolectomy with anastomosis                                        |
|                   |           | 3200301 Total |                                                                             |
|                   |           | 3123002       | Excision of lesion(s) of skin and subcutaneous tissue of ear                |
|                   |           |               | Excision of lesion of skin and subcutaneous tissue of ear                   |

Figure 2. PIMS codes for the most common elective orthopaedic surgical procedures

Proc code = procedure code, proc desc = procedure description

| Theatre Event Spe | Case Type | Proc Code      | Proc Desc                                                        |
|-------------------|-----------|----------------|------------------------------------------------------------------|
| General Surgery   | Acute     | 3037300        | Exploratory laparotomy                                           |
|                   |           |                | Laparotomy                                                       |
|                   |           | 3037300 Total  |                                                                  |
|                   |           | 3044500        | Laparoscopic cholecystectomy                                     |
|                   |           | 3044500 Total  |                                                                  |
|                   |           | 3022301        | Incision and drainage of abscess of skin and subcutaneous tissue |
|                   |           | 3022301 Total  |                                                                  |
|                   |           | 3057200        | Laparoscopic appendicectomy                                      |
|                   |           | 3057200 Total  |                                                                  |
|                   |           | 3061402        | Repair of inguinal hernia, unilateral                            |
|                   |           |                | Repair of inguinal hernia unilateral                             |
|                   |           | 3061402 Total  |                                                                  |
|                   |           | 3039000A       | Laparoscopy Diagnostic                                           |
|                   |           | 3039000A Total |                                                                  |
|                   |           | 3002300        | Excisional debridement of soft tissue                            |
|                   |           |                | Excisional debridement and washout of soft tissue                |
|                   |           | 3002300 Total  |                                                                  |
|                   |           | 3217100        | Anorectal examination                                            |
|                   |           | 3217100 Total  |                                                                  |
|                   |           | 3038500        | Postoperative reopening of laparotomy site                       |
|                   |           | 3038500 Total  |                                                                  |
|                   |           | 3207500        | Rigid sigmoidoscopy                                              |
|                   |           | 3207500 Total  |                                                                  |

Figure 3. PIMS codes for the most common acute general surgical procedures

Proc code = procedure code, proc desc = procedure description

|              |       |                |                                                                                                              |  |  |
|--------------|-------|----------------|--------------------------------------------------------------------------------------------------------------|--|--|
| Orthopaedics | Acute | 4752200        | Hemiarthroplasty of femur                                                                                    |  |  |
|              |       | 4752200 Total  |                                                                                                              |  |  |
|              |       | 4751900B       | Closed reduction & internal fixation of fracture of trochanteric or subcapital femur                         |  |  |
|              |       | 4751900B Total |                                                                                                              |  |  |
|              |       | 3002300        | Excisional debridement of soft tissue                                                                        |  |  |
|              |       |                | Excisional debridement and washout of soft tissue                                                            |  |  |
|              |       | 3002300 Total  |                                                                                                              |  |  |
|              |       | 4751900        | Internal fixation of fracture of trochanteric or subcapital femur                                            |  |  |
|              |       | 4751900 Total  |                                                                                                              |  |  |
|              |       | 4753100        | Closed reduction of fracture of femur (shaft or distal) with internal fixation                               |  |  |
|              |       |                | Closed reduction of fracture of femur with internal fixation                                                 |  |  |
|              |       | 4753100 Total  |                                                                                                              |  |  |
|              |       | 4736602        | Open reduction of fracture of distal radius with internal fixation                                           |  |  |
|              |       | 4736602 Total  |                                                                                                              |  |  |
|              |       | 4704800        | Closed reduction of dislocation of hip                                                                       |  |  |
|              |       |                | Closed reduction of dislocation of hip MUA                                                                   |  |  |
|              |       | 4704800 Total  |                                                                                                              |  |  |
|              |       | 9066500        | Excisional debridement of skin and subcutaneous tissue                                                       |  |  |
|              |       |                | Excisional debridement and Washout of skin and subcutaneous tissue                                           |  |  |
|              |       | 9066500 Total  |                                                                                                              |  |  |
|              |       | 4931800        | Total arthroplasty of hip, unilateral                                                                        |  |  |
|              |       |                | Total arthroplasty of hip unilateral (THJR)                                                                  |  |  |
|              |       | 4931800 Total  |                                                                                                              |  |  |
|              |       | 4752801        | Open reduction of fracture of femur (shaft or distal) with internal fixation                                 |  |  |
|              |       |                | Open reduction of fracture of femur with internal fixation                                                   |  |  |
|              |       | 4752801 Total  |                                                                                                              |  |  |
|              |       | 4760001        | Open reduction of fracture of ankle with internal fixation of diastasis, fibula or malleolus                 |  |  |
|              |       | 4760001 Total  |                                                                                                              |  |  |
|              |       | 4760301        | Open reduction of fracture of ankle with internal fixation, 2 of diastasis, fibula or malleolus              |  |  |
|              |       |                | Open reduction of fracture of ankle with internal fixation 2 of diastasis, tibia, fibula or malleolus (ORIF) |  |  |
|              |       | 4760301 Total  |                                                                                                              |  |  |
|              |       | 4739901        | Open reduction of fracture of olecranon with internal fixation                                               |  |  |
|              |       | 4739901 Total  |                                                                                                              |  |  |
|              |       | 4742901        | Open reduction of fracture of proximal humerus with internal fixation                                        |  |  |
|              |       | 4742901 Total  |                                                                                                              |  |  |
|              |       | 4758500        | Internal fixation of fracture of patella                                                                     |  |  |
|              |       | 4758500 Total  |                                                                                                              |  |  |

Figure 4. PIMS codes for the most common acute orthopaedic surgical procedures
